# Supplementary material
Source: HighWire-hosted journal article supplement (https://www.cmajopen.ca/highwire/filestream/87395/field_highwire_adjunct_files/2/2020-0152-3-at.pdf)
Supplement: 2020-0152-3-at.pdf [file 2020-0152-3-at.pdf]

**Appendix 3 (as supplied by authors)**

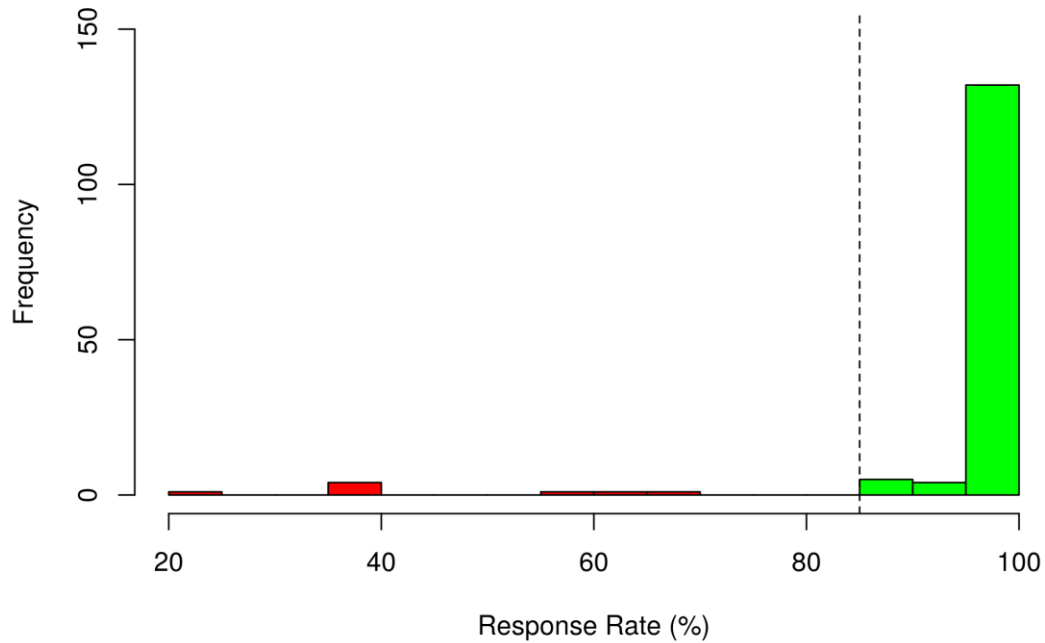

Figure X: A histogram of the survey response rate. A natural break is observed at a response rate of 85% where a dashed line is present. Samples with a response rate of 85% or more were included in the study (green bars). Samples with a response rate less than 85% (red bars) were removed from the analysis due to potential non-response bias (n=8).
